# Supplementary material for: Extracellular association of APP and tau fibrils induces intracellular aggregate formation of tau
Source: PubMed Central journal article supplement (PMC4436700; doi:10.1007/s00401-015-1415-2), 2015-04-14
Supplement: 401_2015_1415_MOESM1_ESM.pdf [file 401_2015_1415_MOESM1_ESM.pdf]

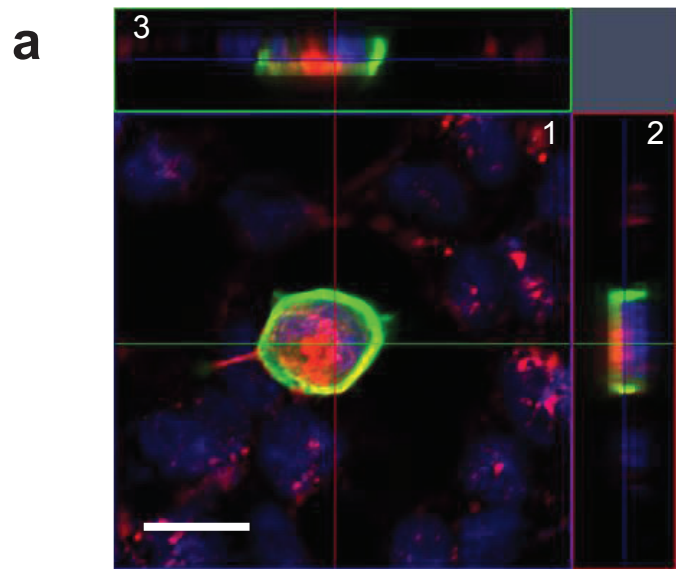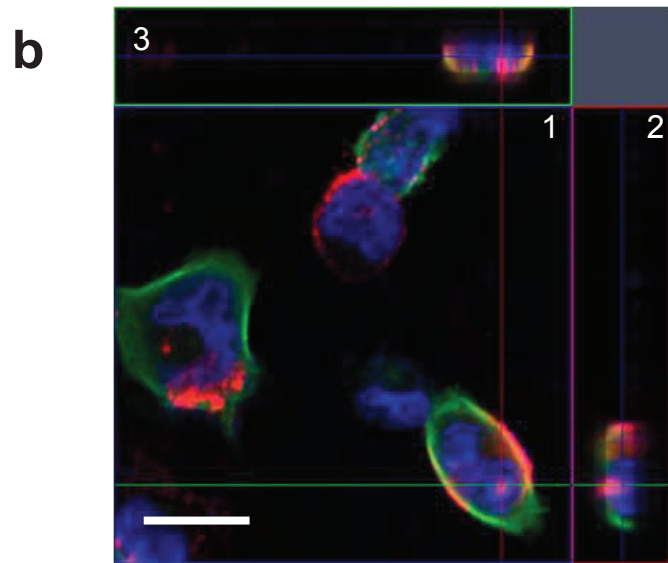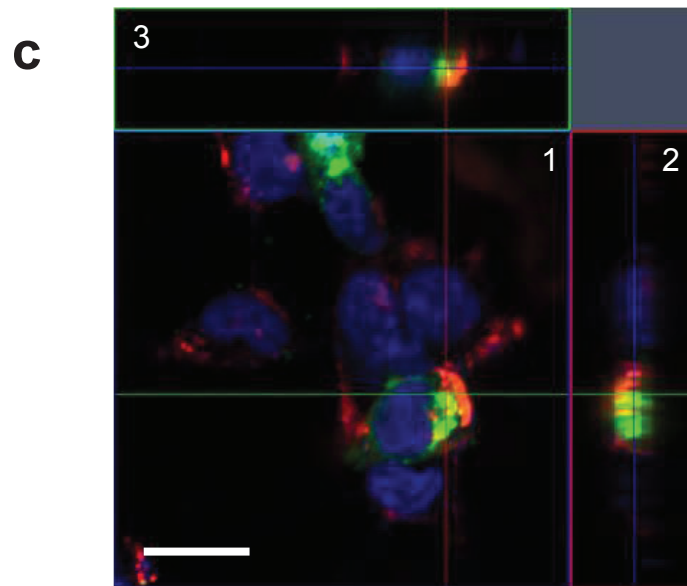

**Fig. S1**
